# Supplementary material for: A single mutation in Crimean-Congo hemorrhagic fever virus discovered in ticks impairs infectivity in human cells
Source: eLife journal article supplement (doi:10.7554/elife.50999), 2020-10-21
Supplement: supp [file elife-50999-supp-v1.zip]

Archive with 13 entries (13 files):
- elife_poa_e50999_Transparent_Reporting_File.docx
- elife_poa_e50999_Figure_1_figure_supplement_1.pdf
- elife_poa_e50999_Figure_1_figure_supplement_2.pdf
- elife_poa_e50999_Figure_1_figure_supplement_3.pdf
- elife_poa_e50999_Figure_1_figure_supplement_4.pdf
- elife_poa_e50999_Figure_1_figure_supplement_5.pdf
- elife_poa_e50999_Figure_2_figure_supplement_1.pdf
- elife_poa_e50999_Figure_2_figure_supplement_2.pdf
- elife_poa_e50999_Figure_4_figure_supplement_1.pdf
- elife_poa_e50999_Supplementary_file_1.docx
- elife_poa_e50999_Supplementary_file_2.docx
- elife_poa_e50999_Supplementary_file_3.docx
- elife_poa_e50999_Supplementary_file_4.docx
