# Supplementary figures and images for: A single mutation in Crimean-Congo hemorrhagic fever virus discovered in ticks impairs infectivity in human cells
Source: eLife journal article supplement (doi:10.7554/elife.50999), 2020-10-21

Figure 4 - Figure supplement 1

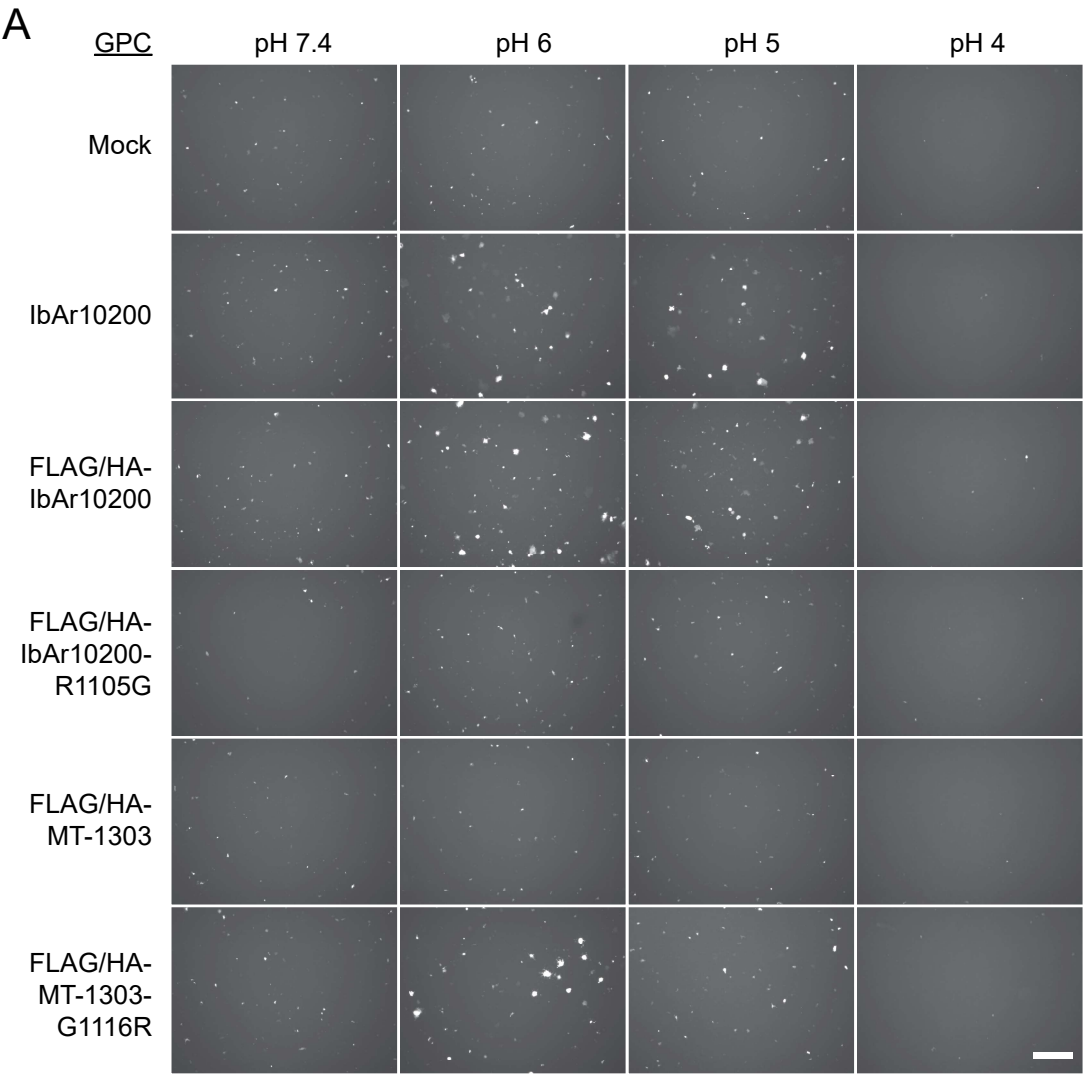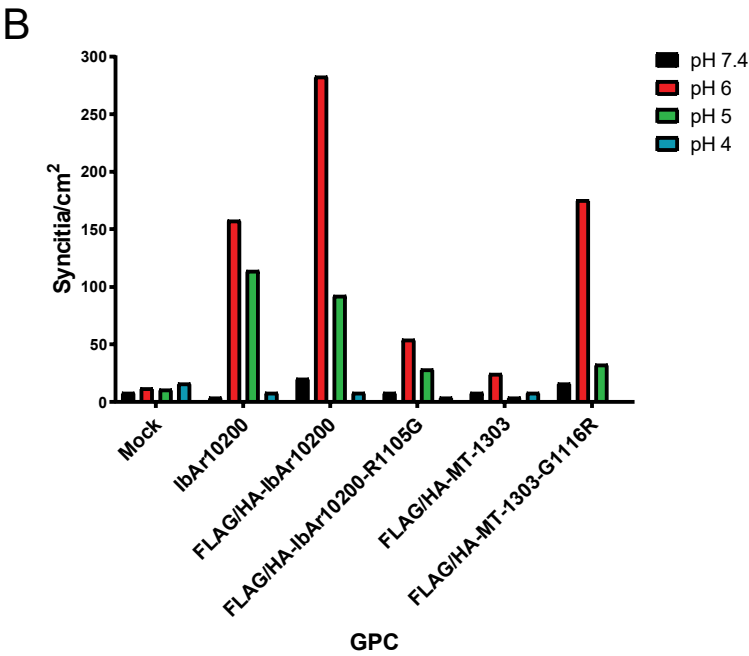

Supplement: supp [file elife-50999-supp-v1.zip]

Figure 1 - Figure supplement 1

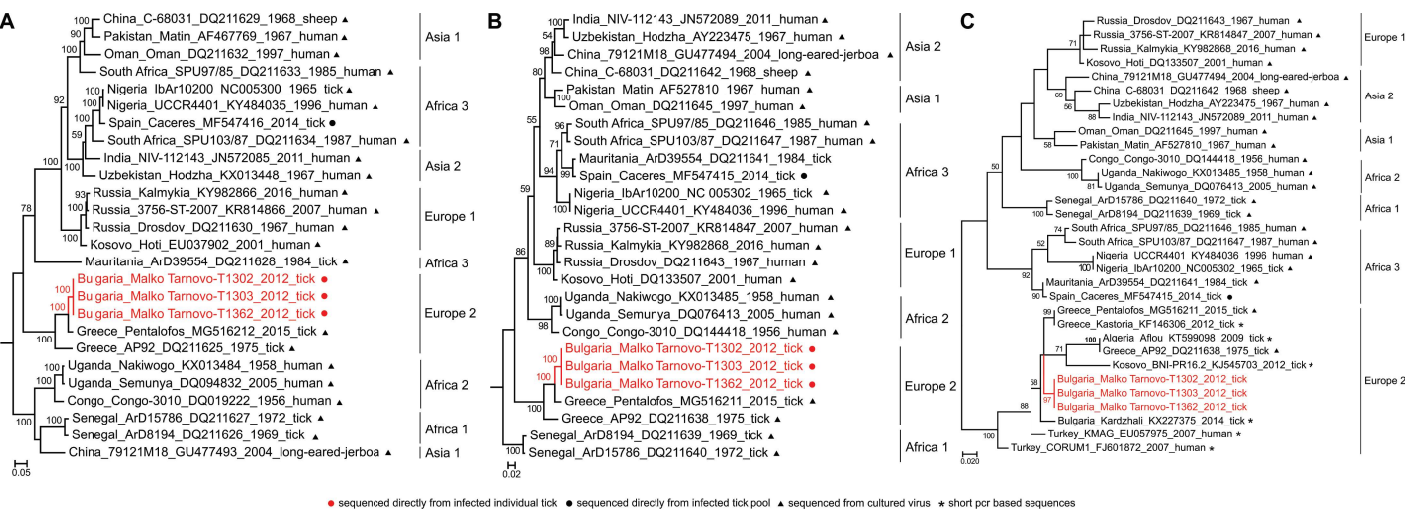

Supplement: supp [file elife-50999-supp-v1.zip]

Figure 1 - Figure supplement 4

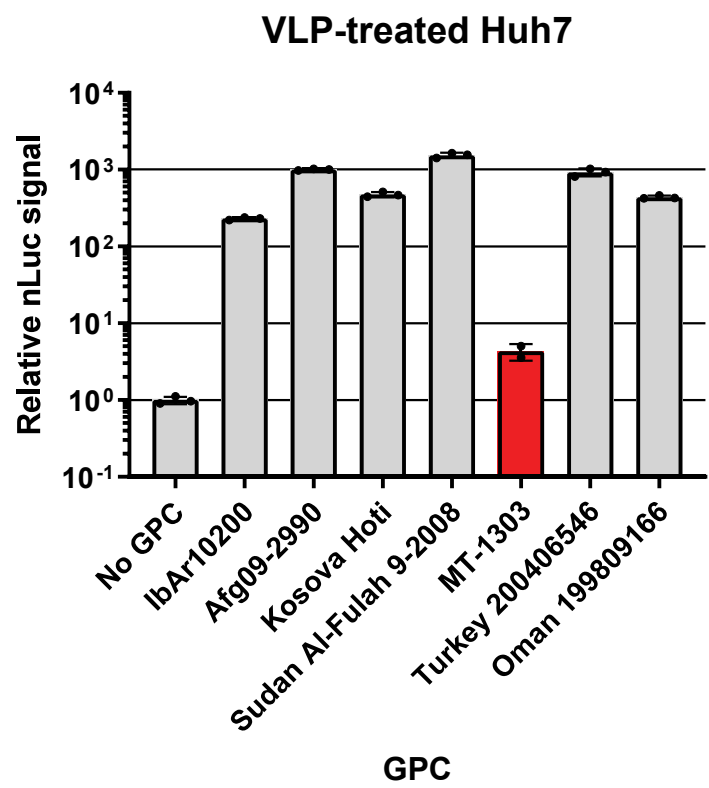

Supplement: supp [file elife-50999-supp-v1.zip]

Figure 1 - Figure supplement 3

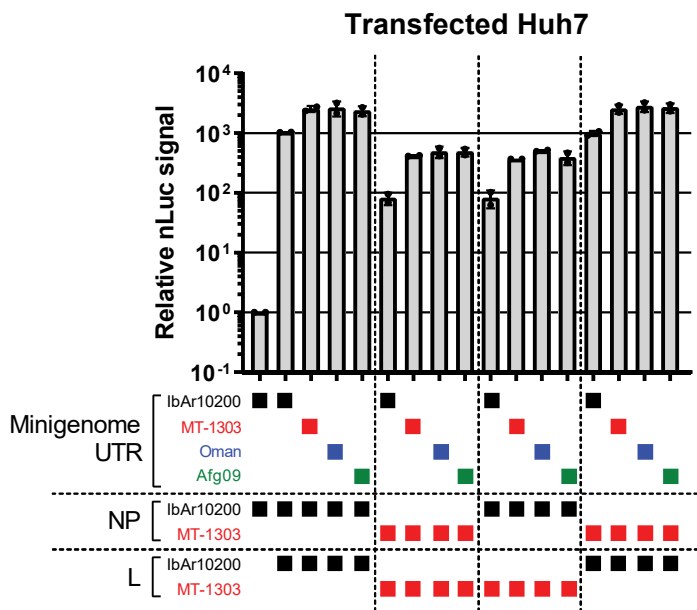

Supplement: supp [file elife-50999-supp-v1.zip]

Figure 2 - Figure supplement 1

A

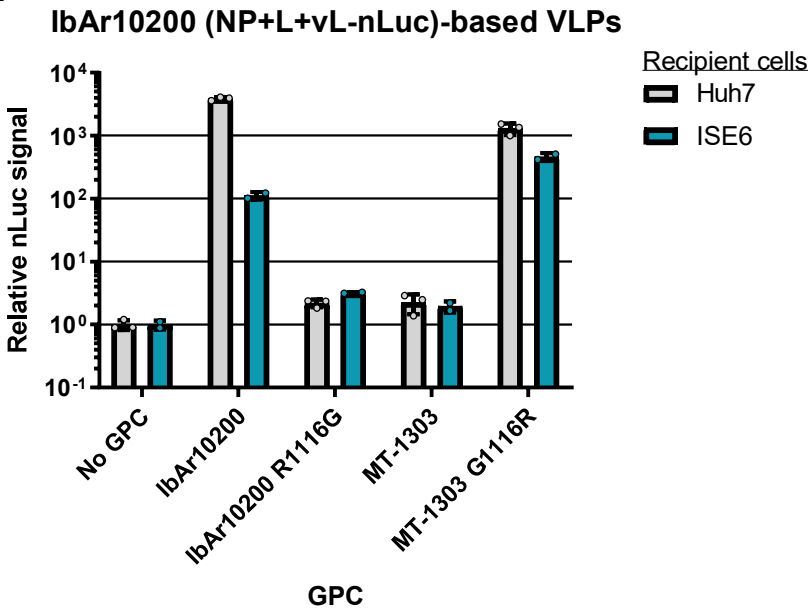

B

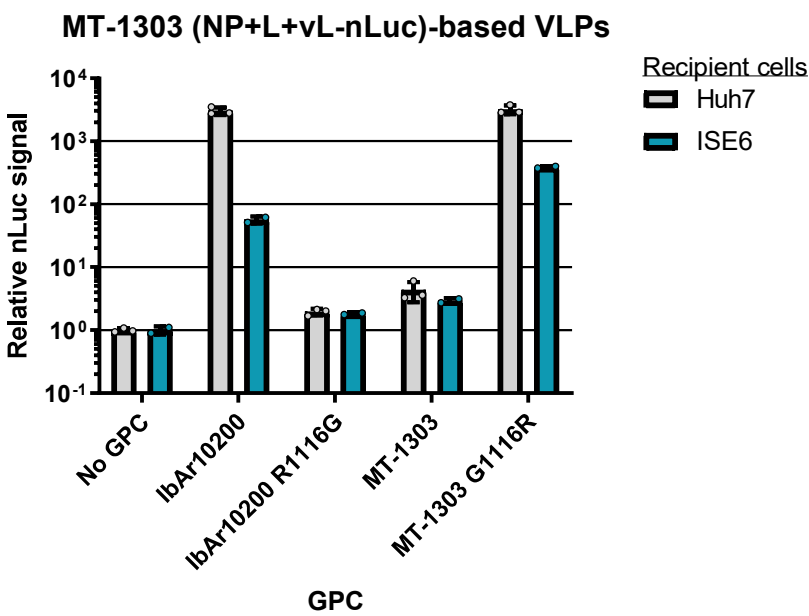

Supplement: supp [file elife-50999-supp-v1.zip]

Figure 1 - Figure supplement 5

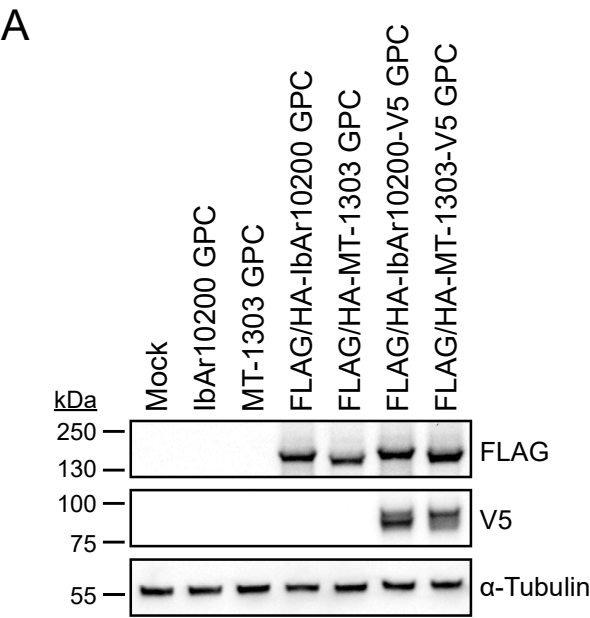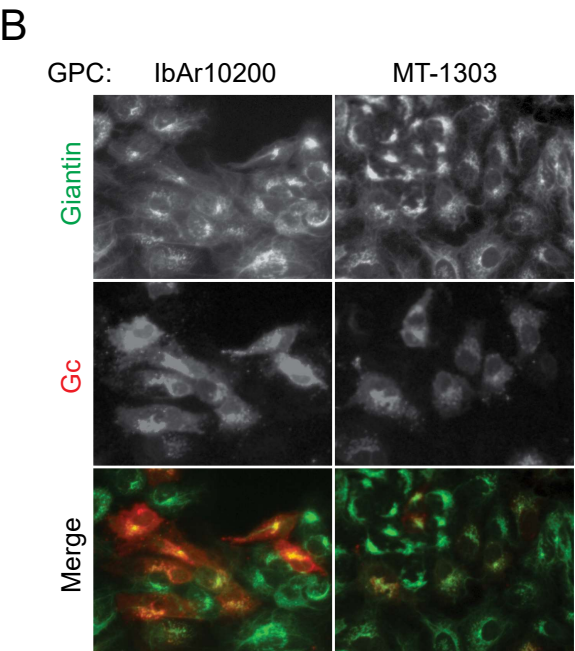

Supplement: supp [file elife-50999-supp-v1.zip]

Figure 1 - Figure supplement 2

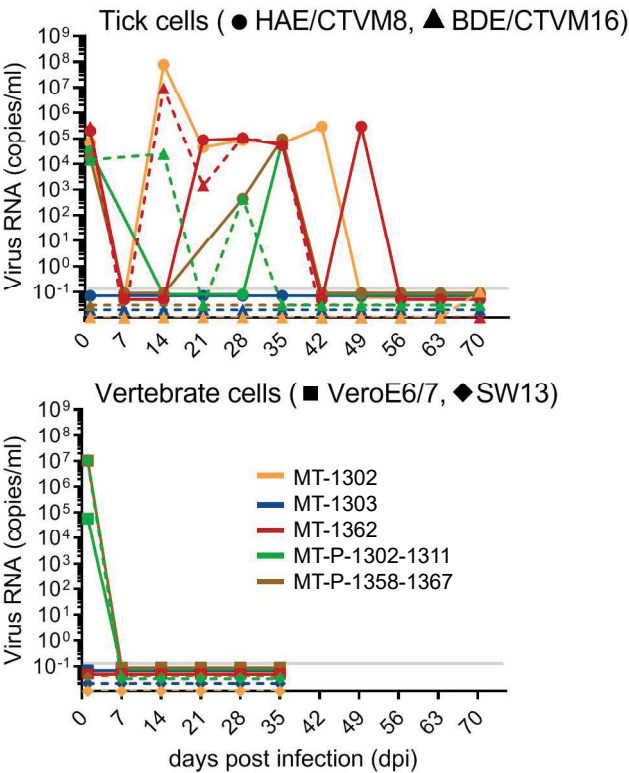

Supplement: supp [file elife-50999-supp-v1.zip]

Figure 2 - Figure supplement 2

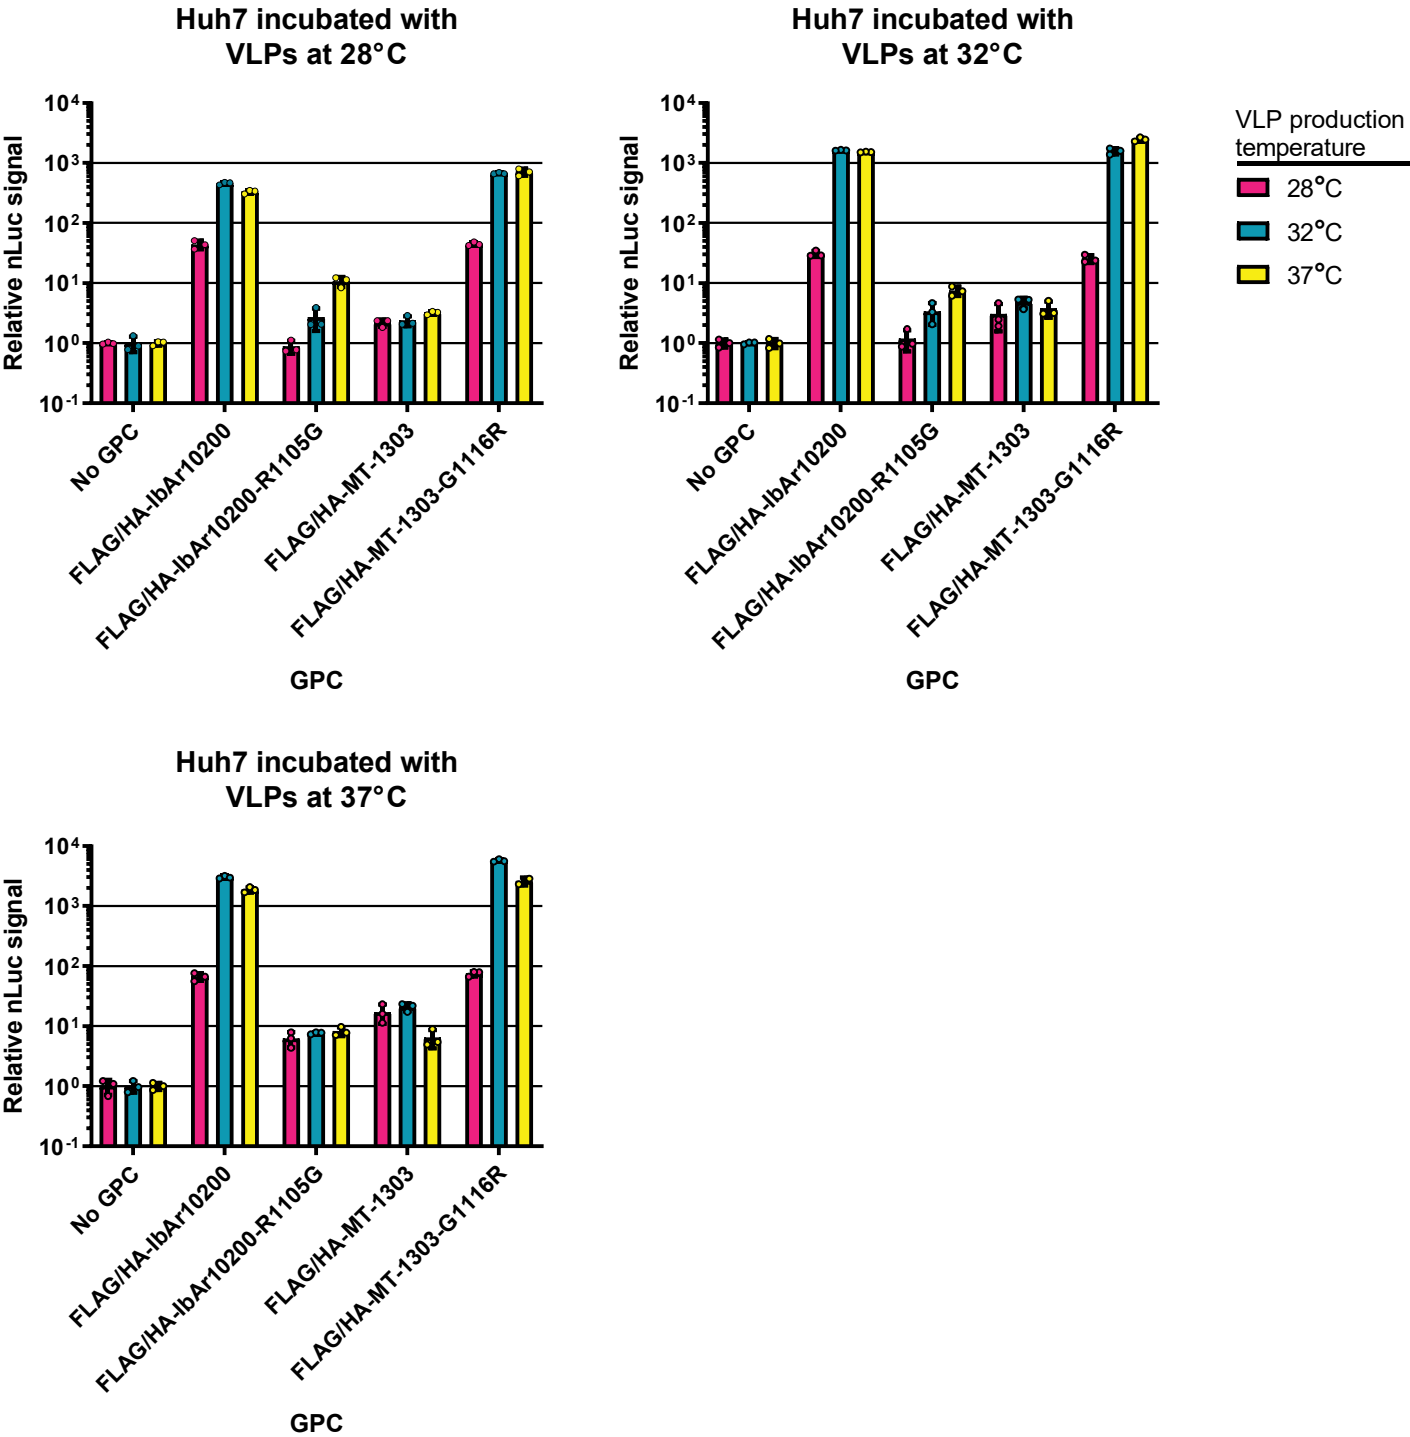

Supplement: supp [file elife-50999-supp-v1.zip]
